# Supplementary material
Source: publisher figshare collection journal article supplement (https://acs.figshare.com/ndownloader/files/5060749)
Supplement: Supplementary file 1 [file 5060749]

**The influence of phylogeny on posttranscriptional modification of rRNA  
in  
thermophilic prokaryotes: The complete  
modification map of 16S rRNA of *Thermus thermophilus*\***

Rebecca Guymon,<sup>‡</sup> Steven C. Pomerantz,<sup>‡</sup> Pamela F. Crain<sup>‡</sup> and James A. McCloskey<sup>‡,¶</sup>

## Supporting Information

Table S1. Assignments for monomer mass fragment ions used for detection of modified residues in RNase digest oligonucleotides

| Nucleoside                         | <i>m/z</i> | assignment <sup>a</sup>         |
|------------------------------------|------------|---------------------------------|
| m <sup>7</sup> G, m <sup>2</sup> G | 164        | mGua                            |
|                                    | 358        | mG>p                            |
|                                    | 376        | mGp                             |
| m <sub>2</sub> <sup>2</sup> G      | 178        | m <sub>2</sub> Gua              |
|                                    | 372        | m <sub>2</sub> G>p              |
| Ψ                                  | 225        | Ψ – H <sub>2</sub> O            |
|                                    | 207        | Ψ – 2H <sub>2</sub> O           |
|                                    | 189        | 207 – H <sub>2</sub> O          |
|                                    | 164        | 207 – HNCO                      |
| m <sub>2</sub> <sup>6</sup> A      | 162        | m <sub>2</sub> Ade              |
|                                    | 356        | m <sub>2</sub> <sup>6</sup> A>p |
|                                    | 374        | m <sub>2</sub> <sup>6</sup> Ap  |
| m <sup>5</sup> C                   | 124        | mCyt                            |
|                                    | 336        | mCp                             |
| m <sup>4</sup> Cm                  | 124        | mCyt                            |
|                                    | 332        | mCm>p                           |
|                                    | 350        | mCmp                            |

|                  |     |       |
|------------------|-----|-------|
| Cm               | 398 | pCm>p |
| m <sup>3</sup> U | 125 | mUra  |
|                  | 319 | mU>p  |
|                  | 337 | mUp   |

<sup>a</sup> All are singly charged negative ions

Fig. S1

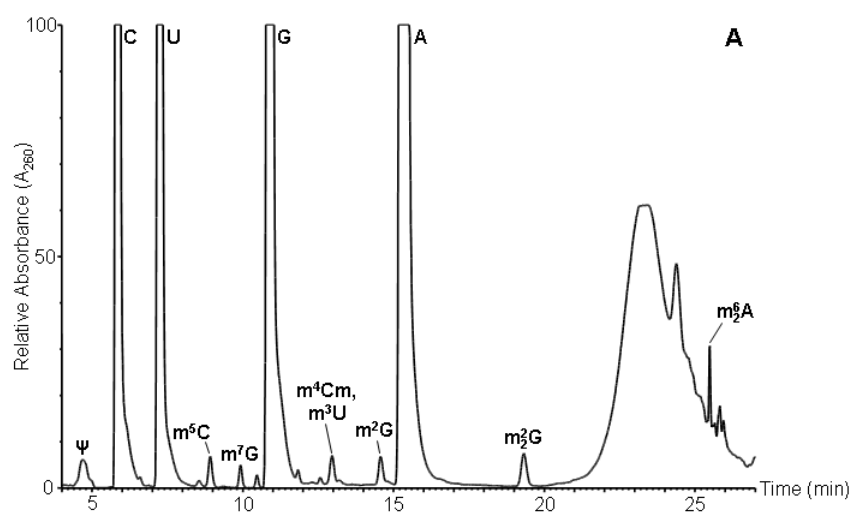

FIGURE S1. Census of modified nucleosides in *Thermus thermophilus* 16S rRNA by LC/MS analysis of a total nucleoside digest.

Fig. S2

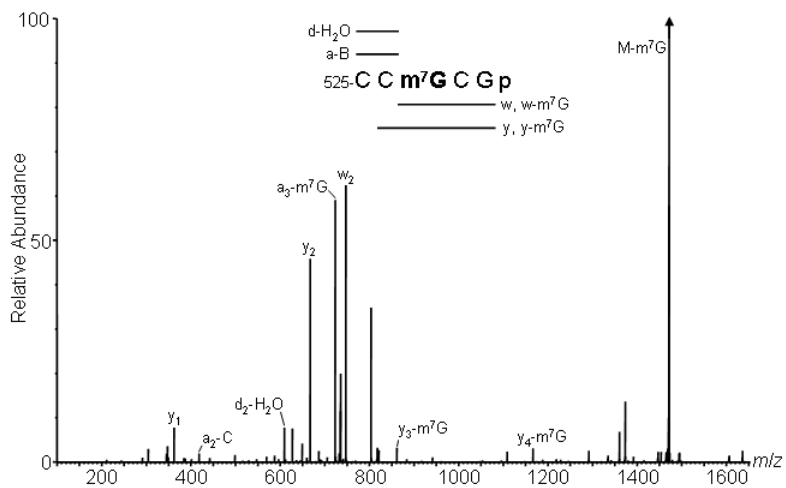

FIGURE S2. Mass spectrum from CID of 525-CCm<sup>7</sup>GCGp.

Fig. S3

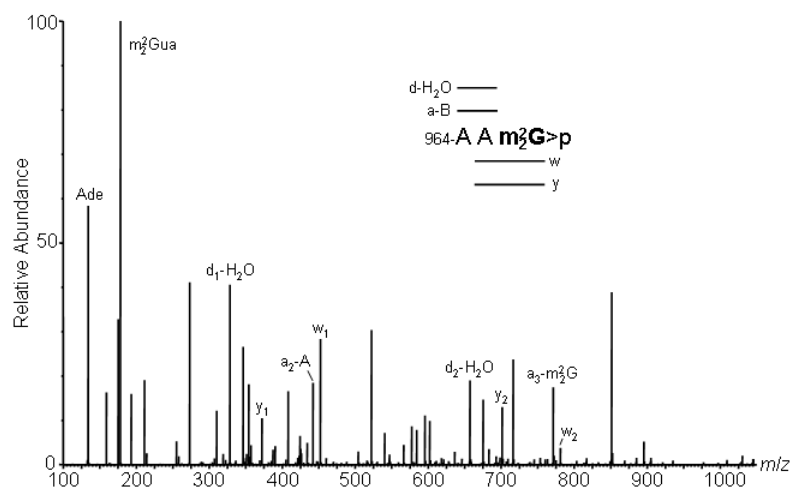

FIGURE S3. Mass spectrum from CID of 964-AAm<sub>2</sub>G>p, with sequence ions annotated, for placement of m<sub>2</sub>G-966.

Fig. S4

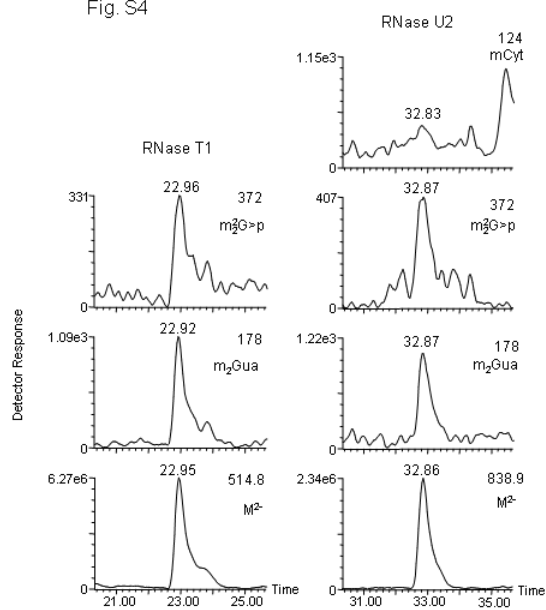

FIGURE S4. Chromatographic time alignments between characteristic low-mass ions and molecular ions in RNase T1 and U2 digests used for placement of adjacent modifications  $m_2^2G$ -966 and  $m^5C$ -967.

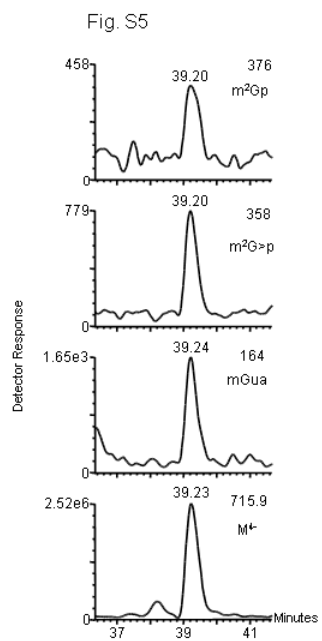

FIGURE S5. Chromatographic time alignments between methylguanine fragment ions and the molecular ion from U2 product  $M_r$  2866, identifying the 1205–1213 oligonucleotide as containing  $m^2G$ .

Fig. S6

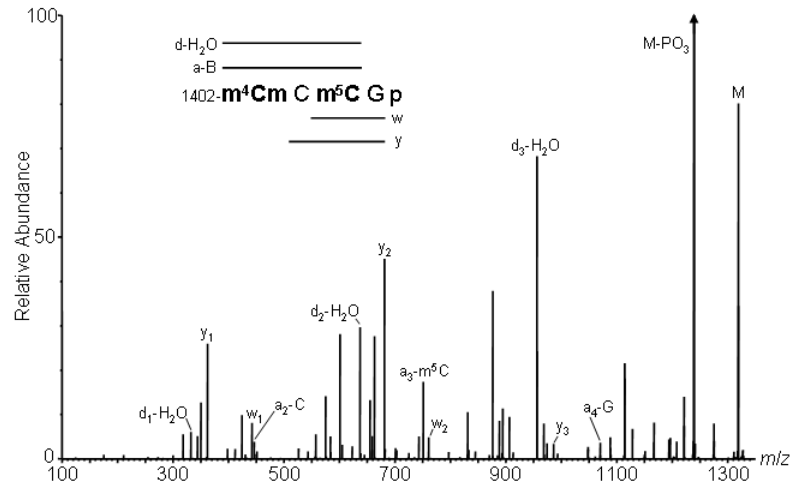

FIGURE S6. Mass spectrum from CID of RNase T1 oligonucleotide  $M_r$  1320 (1402- $m^4CmCm^5CGp$ ), showing sequence ions used for distribution of three methyls in residues 1402 and 1404.

Fig. S7

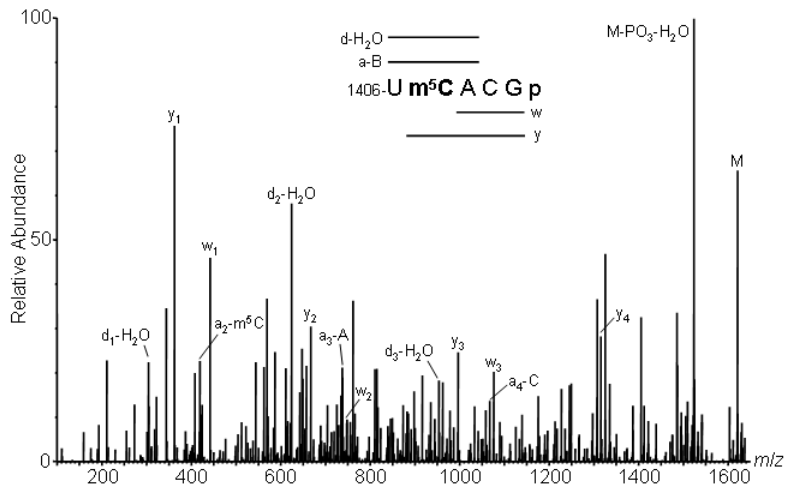

FIGURE S7. Mass spectrum from CID of RNase T1 oligonucleotide  $M_r$  1622 (1406-Um<sup>5</sup>CACGp), showing position of m<sup>5</sup>C-1407 within the heavily methylated segment shown in Figure 6.



Fig. S8

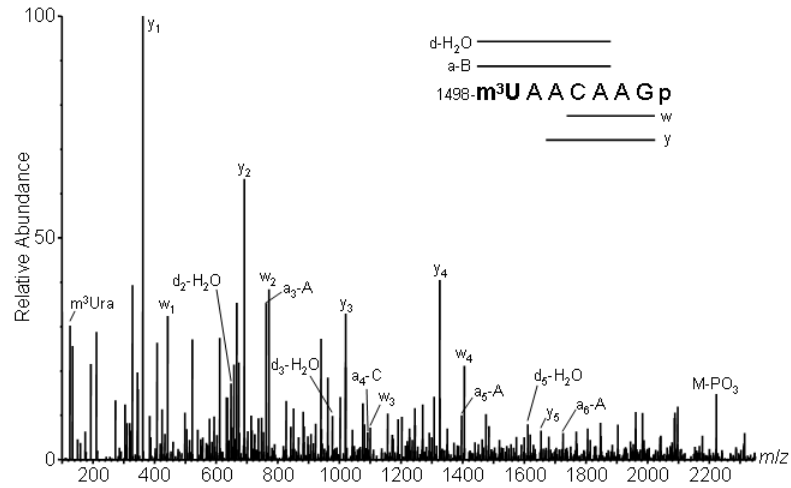

FIGURE S8. Mass spectrum from CID of RNase T1 oligonucleotide  $M_r$  2304 (1498- $m^3\text{UAACAAGp}$ ), showing sequence ions consistent with placement of base-methylated uridine at the 5' terminus of the oligonucleotide.

Fig. S9

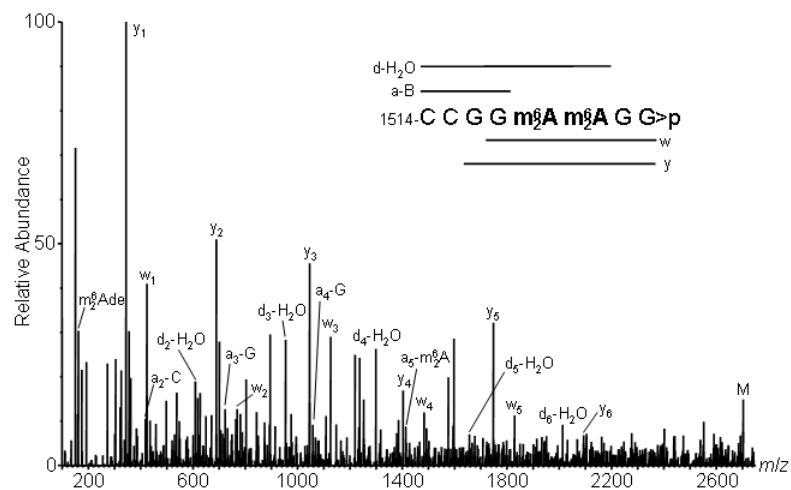

FIGURE S9. Mass spectrum following CID of RNase U2 oligonucleotide  $M_r$  2704, confirming placement of the highly conserved tandem  $m_2^6A$  residues in the loop of helix 45.

Fig. S10

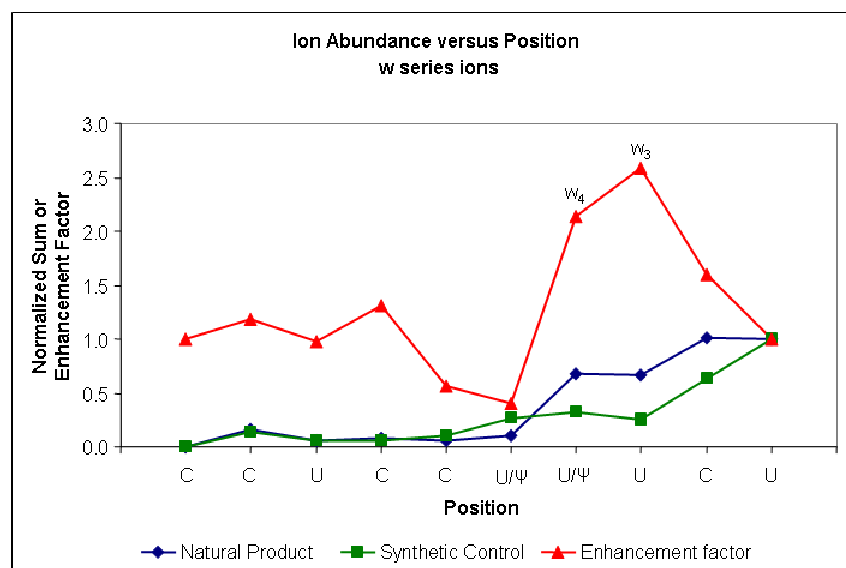

FIGURE S10. Normalized sum, encompassing all observed charge states, of the  $w$  series of sequence ions from the mass spectrum of RNase U2 oligonucleotide  $M_r$  2993, compared with unmodified control oligonucleotide. Enhancement factors (ref 30) for ions  $w_3$  and  $w_4$  result from pseudouridylation of residues six and seven.
